# Supplementary material
Source: MDPI journal article supplement (https://www.mdpi.com/2073-4395/14/3/481)
Supplement: s1 [file s1 › agronomy-2671957-supplementary.pdf]

Supplementary material - ANOVA breakdown, for all photosynthetic parameters.

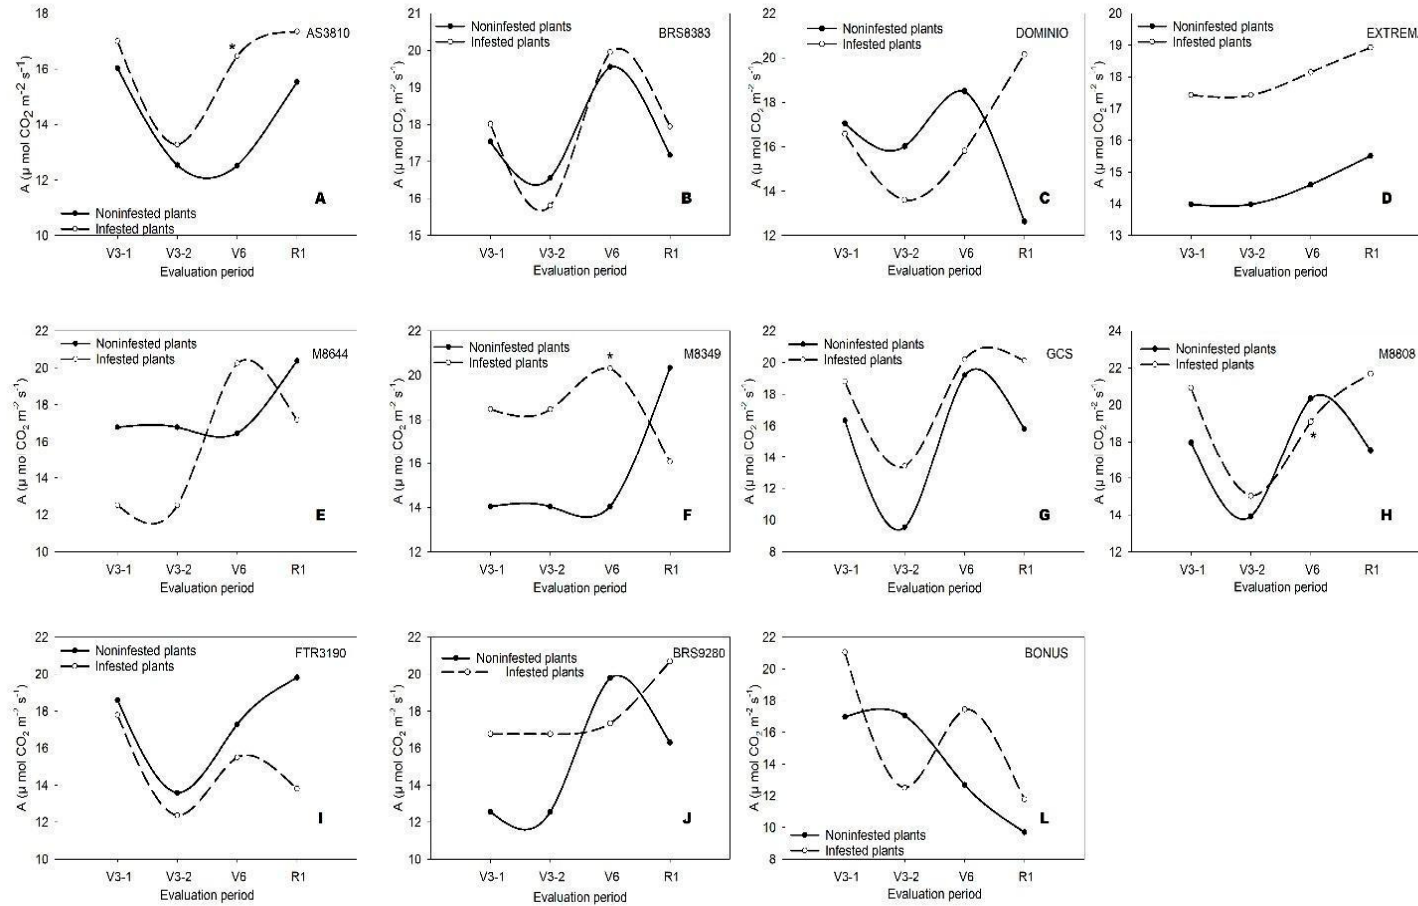

Figure S1 - The effects of herbivory by *Bemisia tabaci* on photosynthetic CO<sub>2</sub> assimilation (A) of soybean cultivars in noninfested and infested plants. \*Asterisks indicate statistically significant differences; P ≤ 0.05.

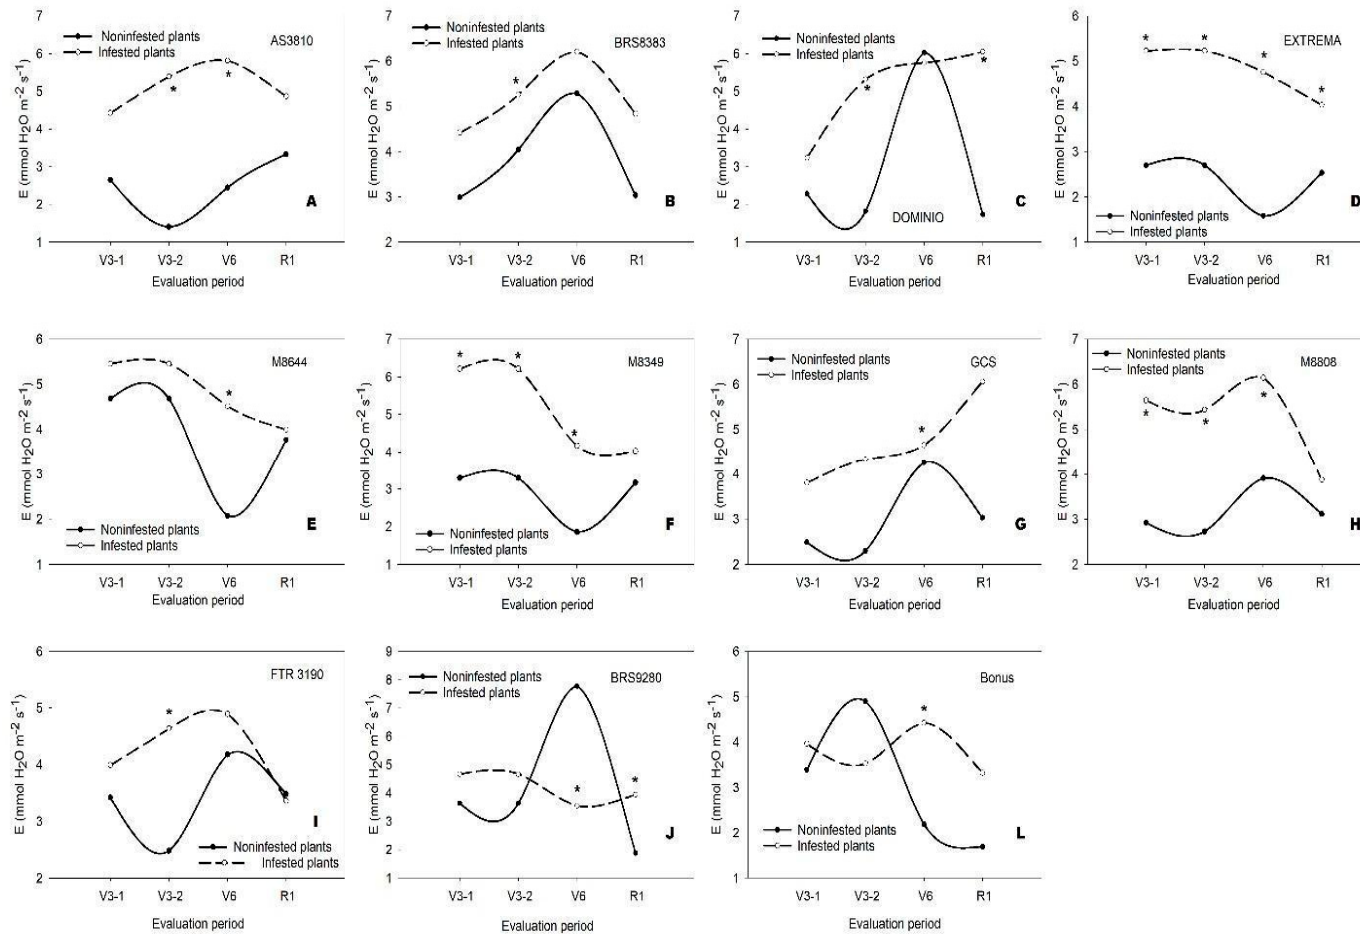

Figure S2 - The effects of herbivory by *Bemisia tabaci* on transpiration (E) of soybean cultivars in noninfested and infested plants. \*Asterisks indicate statistically significant differences;  $P \leq 0.05$ .

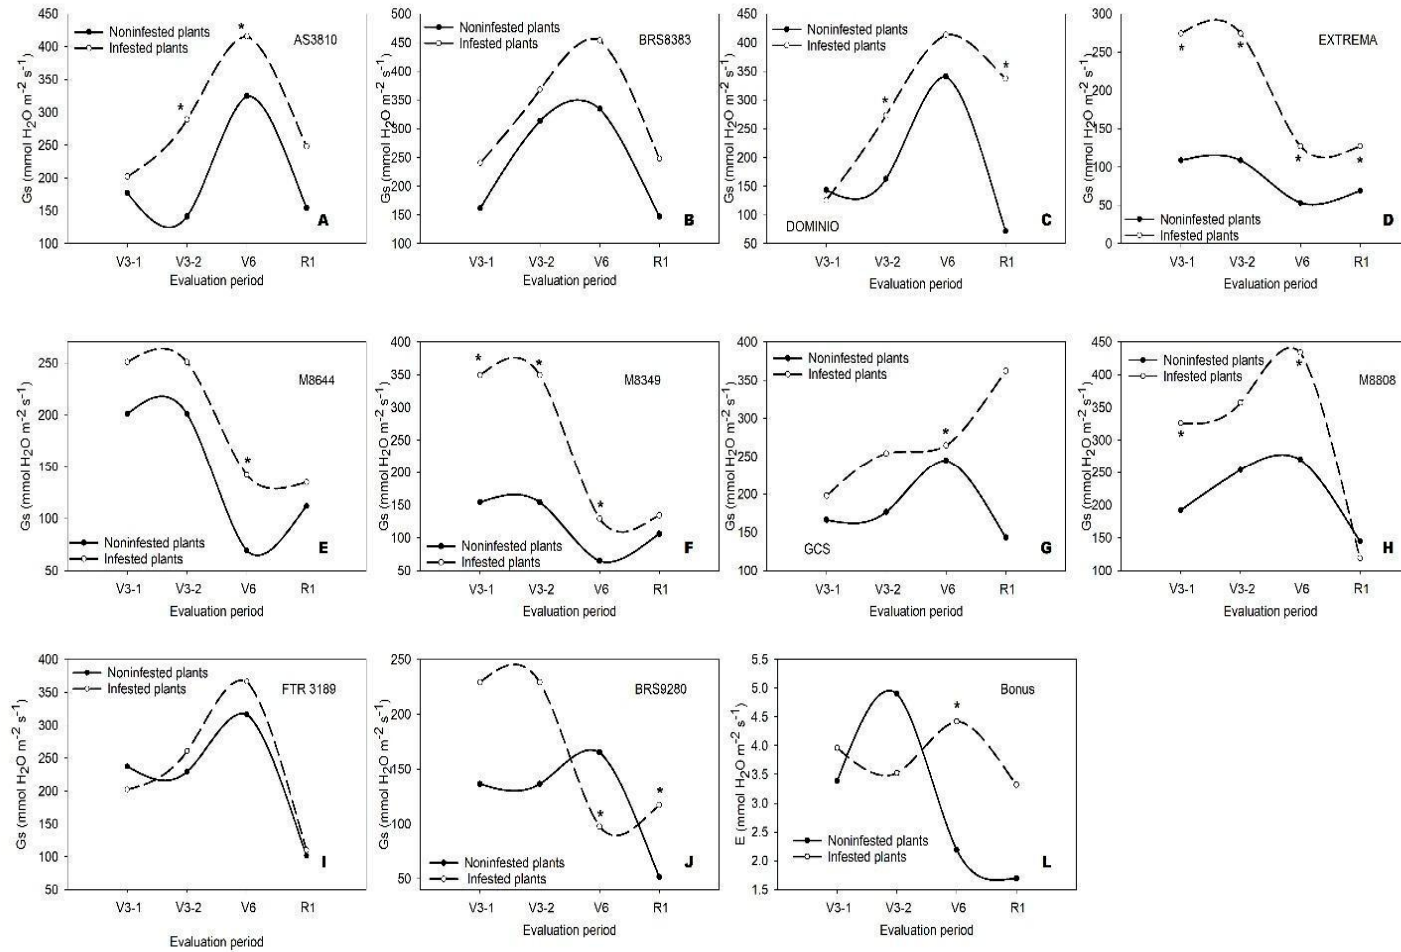

Figure S3 - The effects of herbivory by *Bemisia tabaci* on stomatal conductance to water vapour ( $G_s$ ) of soybean cultivars in noninfested and infested plants. \*Asterisks indicate statistically significant differences;  $P \leq 0.05$ .

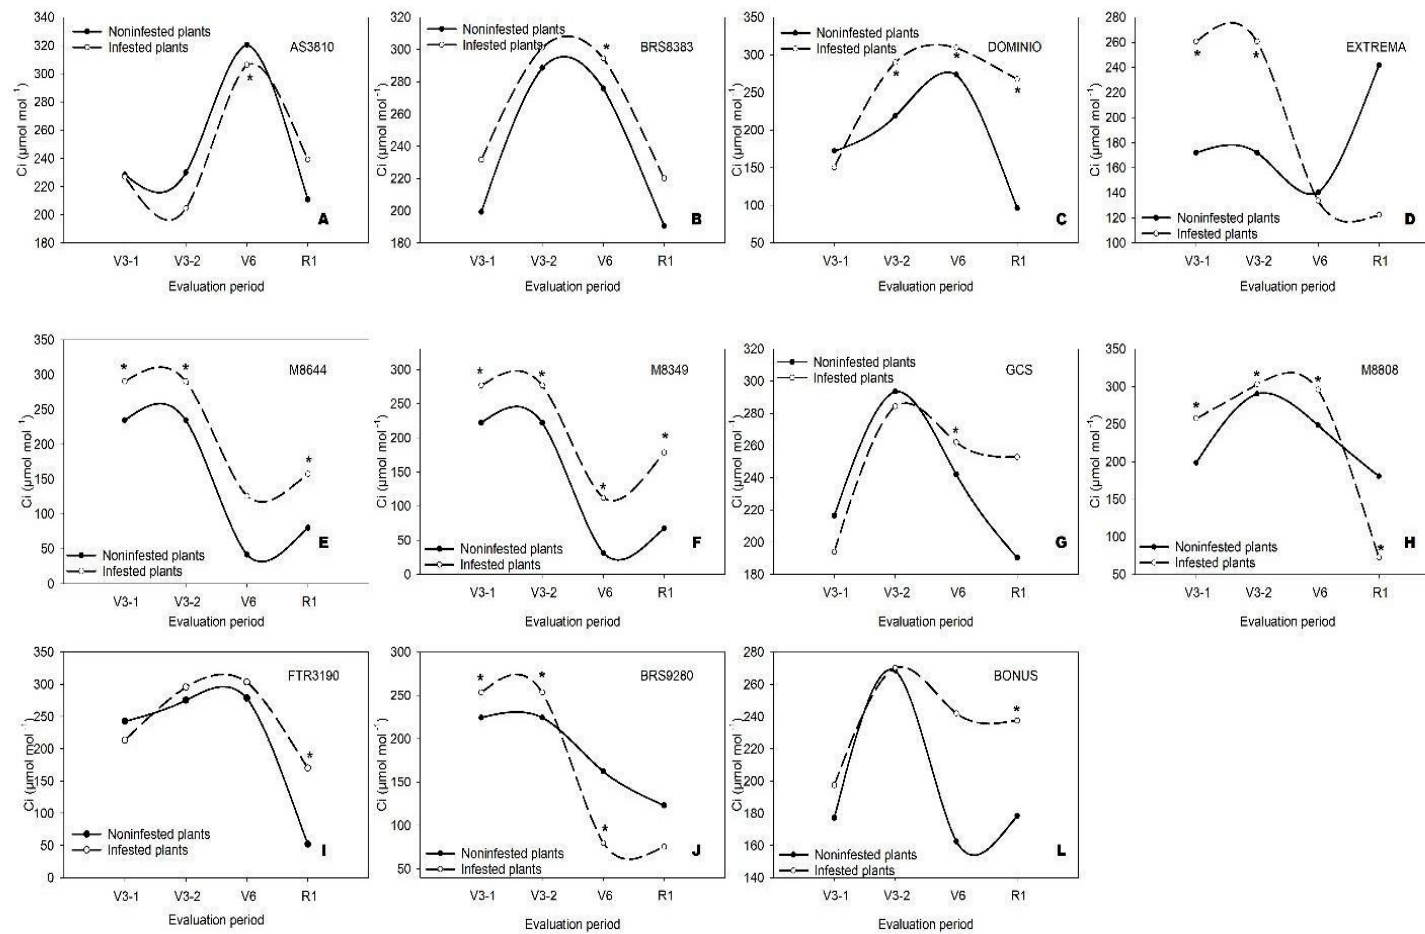

Figure S4 - The effects of herbivory by *Bemisia tabaci* on internal CO<sub>2</sub> concentration (Ci) of soybean cultivars in noninfested and infested plants.  
 \*Asterisks indicate statistically significant differences;  $P \leq 0.05$ .

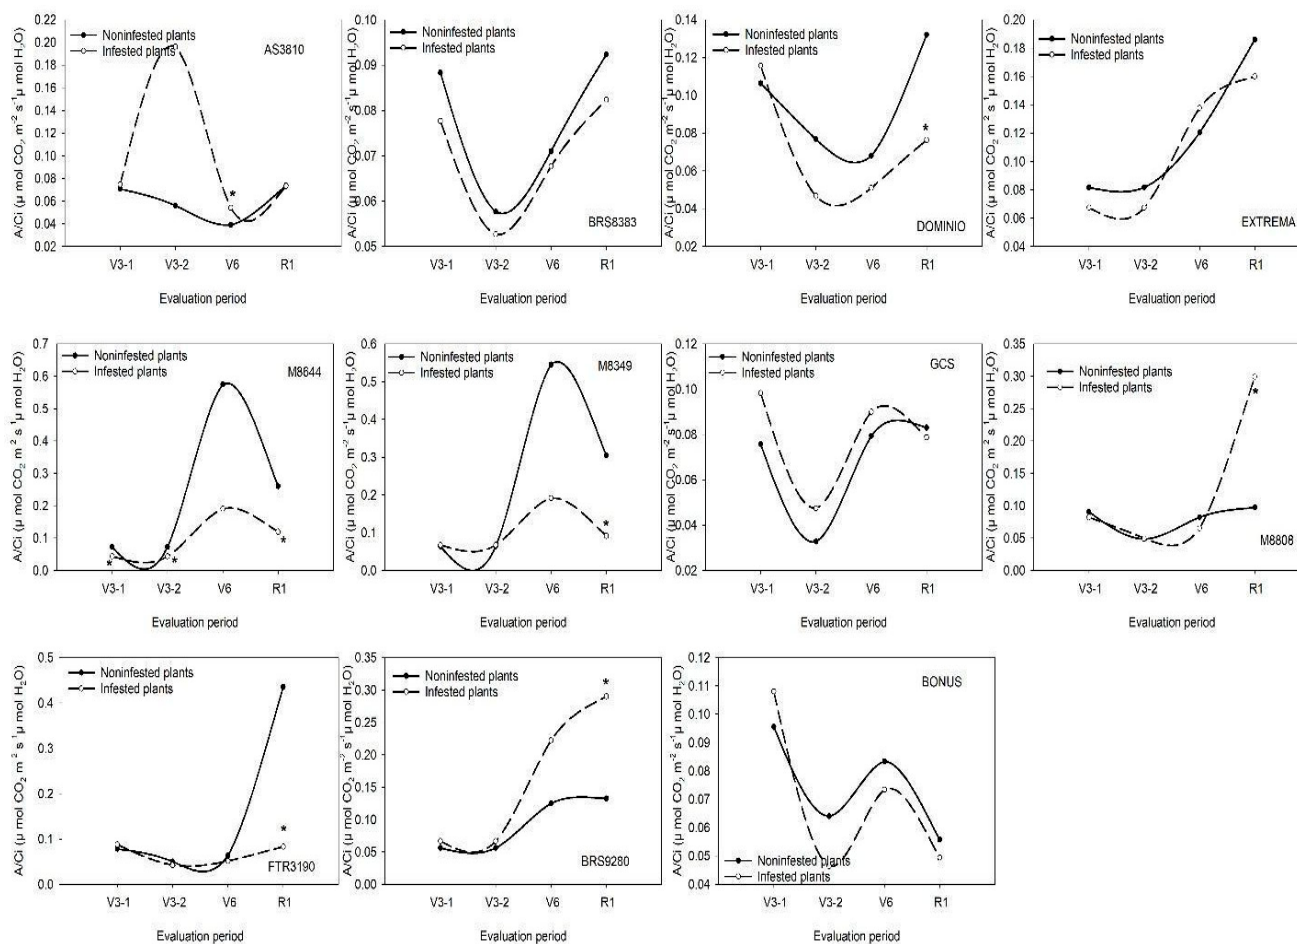

Figure S5 - The effects of herbivory by *Bemisia tabaci* on instantaneous carboxylation efficiency ( $A/C_i$ ) of soybean cultivars in noninfested and infested plants. \*Asterisks indicate statistically significant differences;  $P \leq 0.05$ .

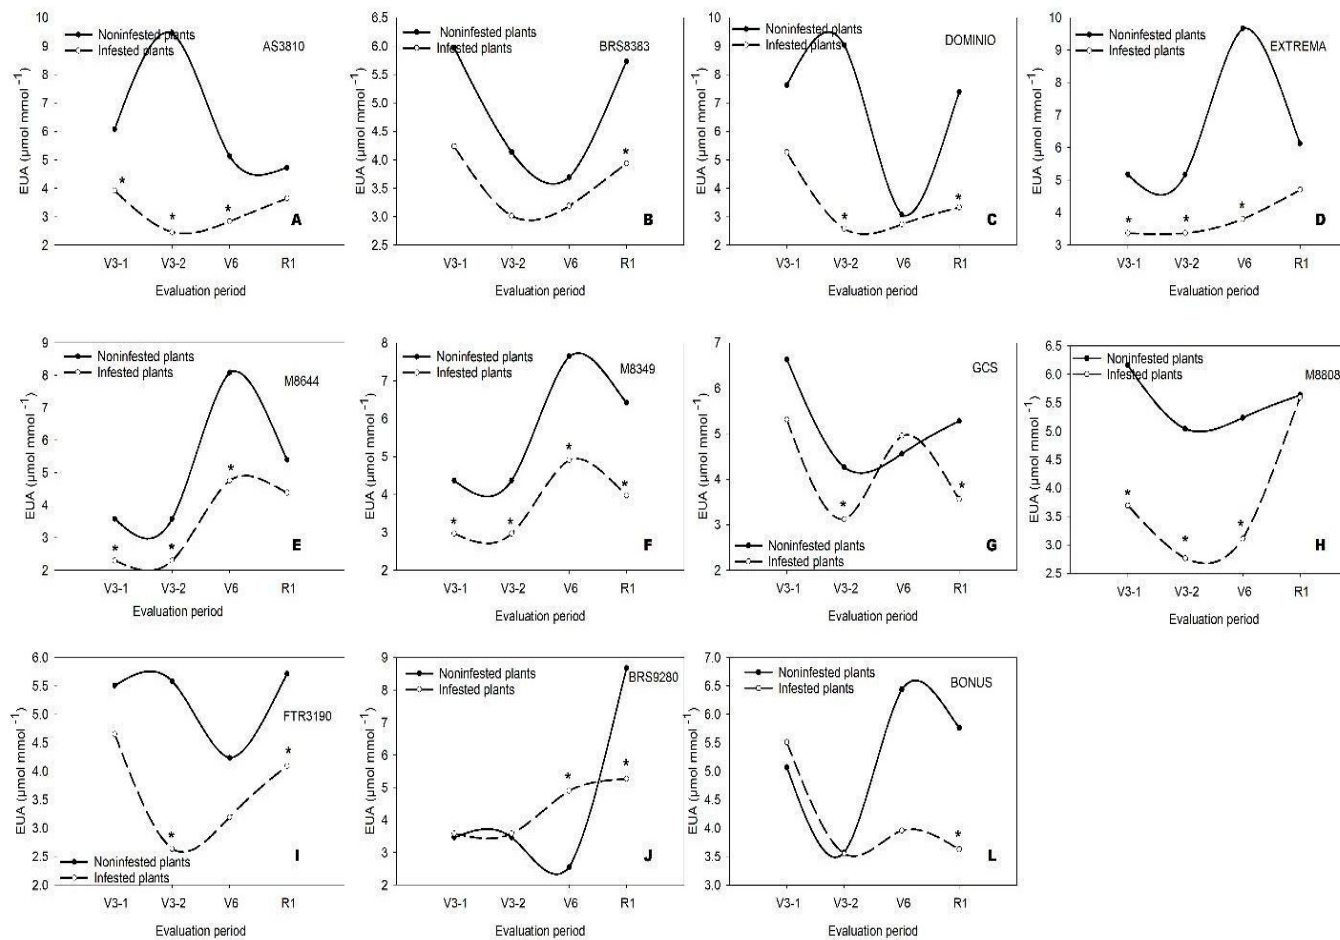

Figure S6 - The effects of herbivory by *Bemisia tabaci* on instantaneous water use efficiency (EUA) of soybean cultivars in noninfested and infested plants. \*Asterisks indicate statistically significant differences;  $P \leq 0.05$ .

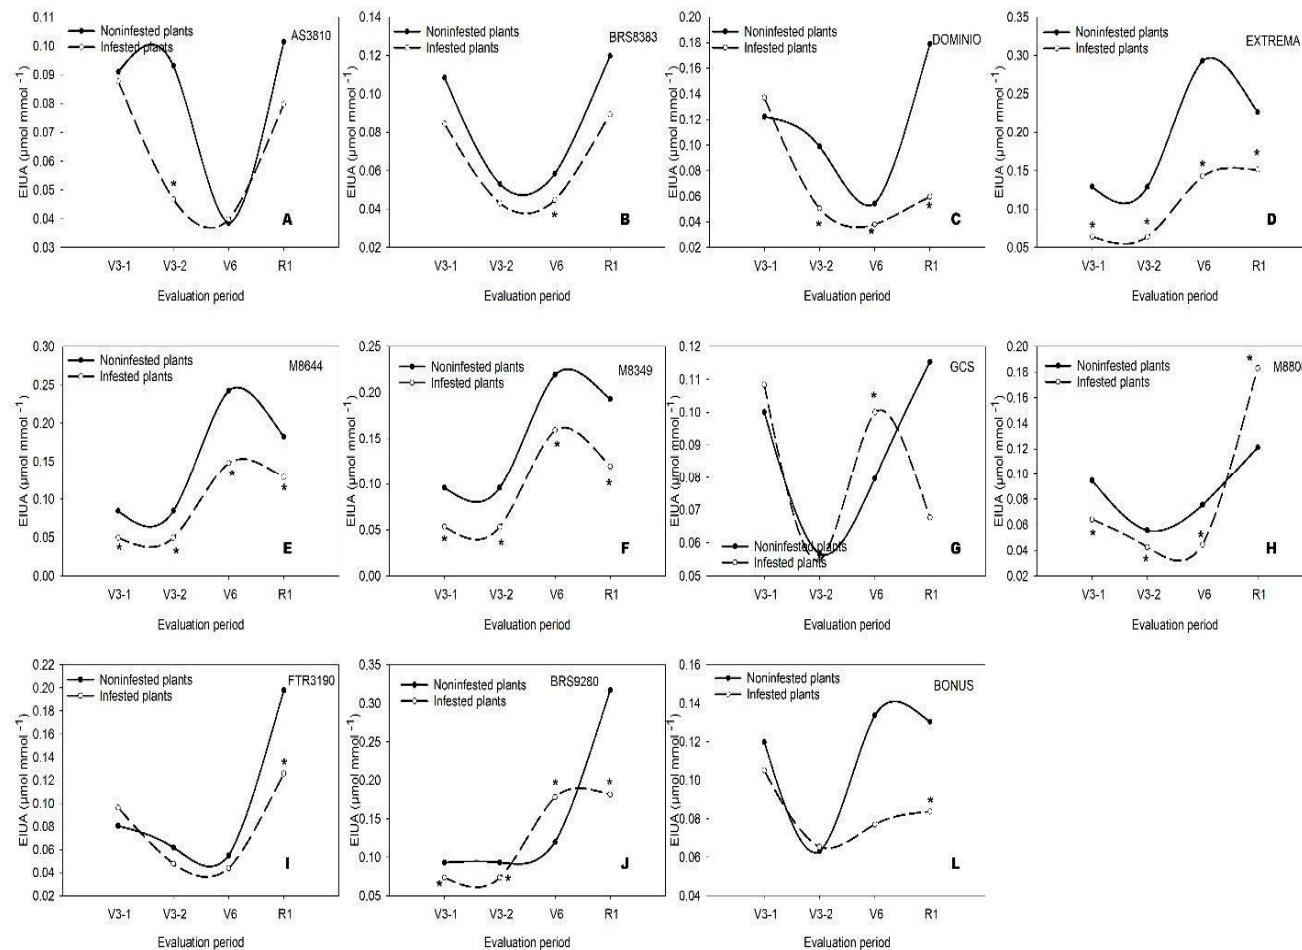

Figure S7 - The effects of herbivory by *Bemisia tabaci* on intrinsic water use efficiency (EIUA) of soybean cultivars in noninfested and infested plants. \*Asterisks indicate statistically significant differences;  $P \leq 0.05$ .
